# Supplementary material for: Silenes in organic synthesis: a short synthesis of prelactone B
Source: Royal Society of Chemistry journal article supplement (doi:10.1039/b608989e), 2006-01-01

## **Silenes in Organic Synthesis: A Short Synthesis of Prelactone B**

Jonathan D. Sellars and Patrick G. Steel\*

Department of Chemistry, University of Durham, Science Laboratories, South Road,  
Durham, DH1 3LE UK.

Fax: 44 (0)191 384 4737;

Tel: +44 (0)191 334 2131;

E-mail: [p.g.steel@durham.ac.uk](mailto:p.g.steel@durham.ac.uk)

### **Supplementary Data**

**$^1\text{H}$  and  $^{13}\text{C}$  NMR spectra for compounds 1, 10-16**

NMR data for compound **10a**

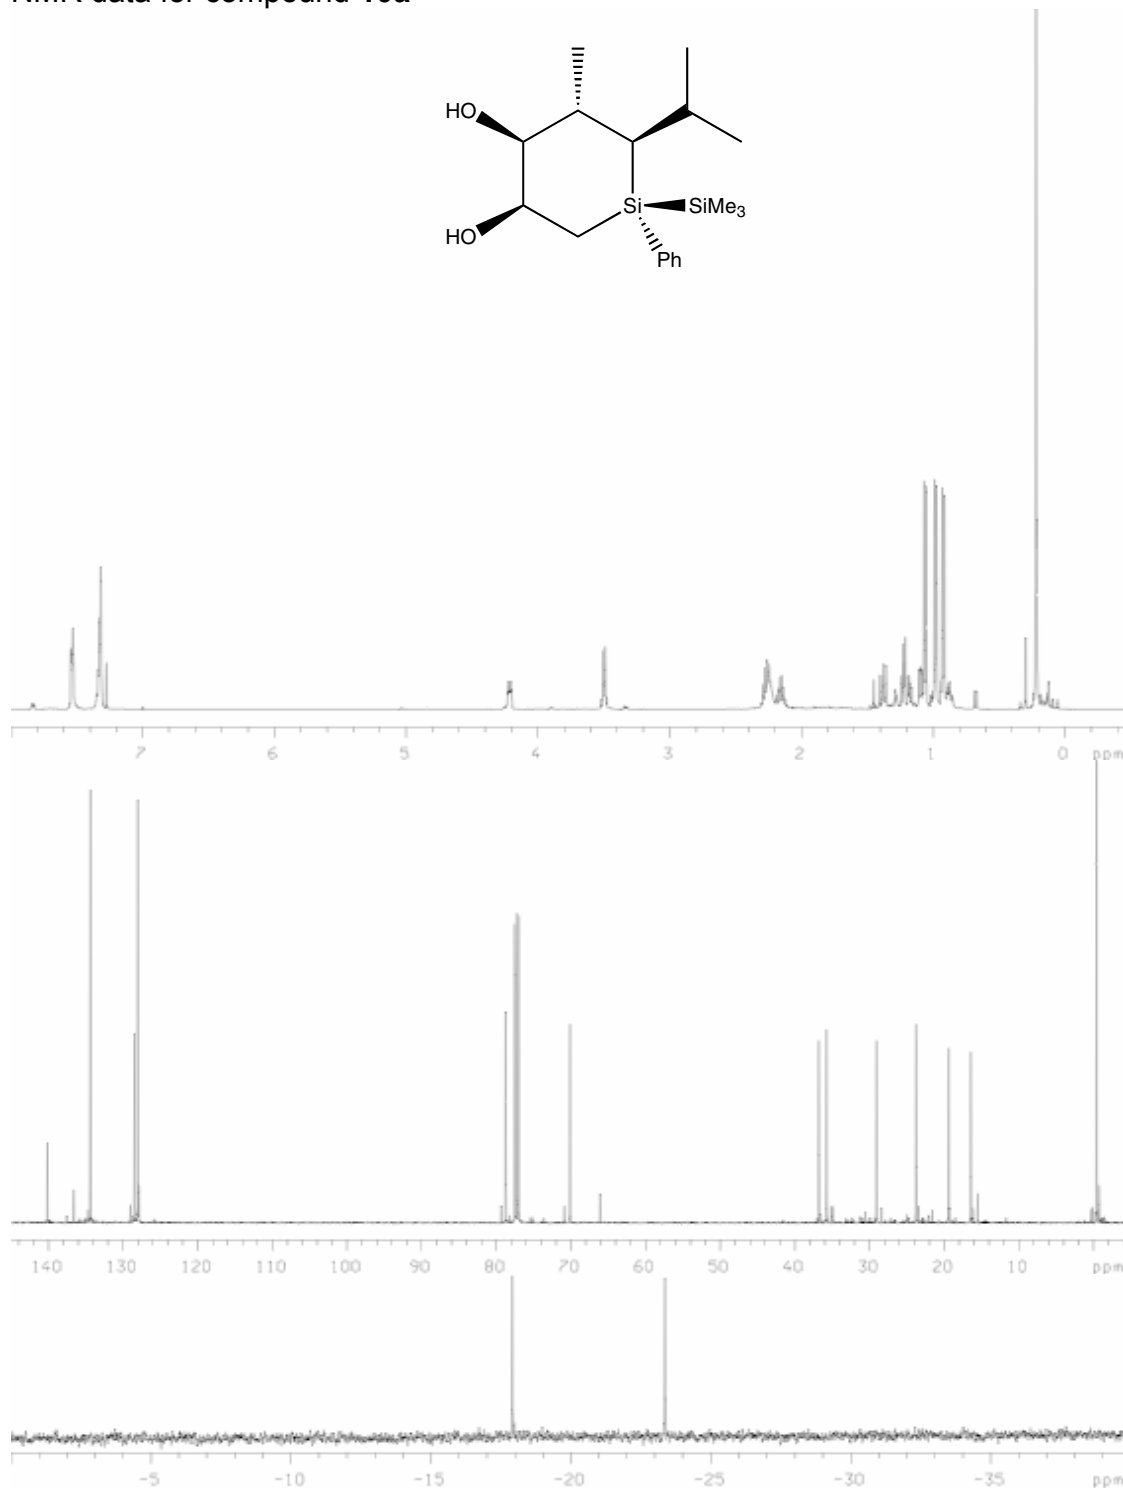

NMR data for compound **13a**

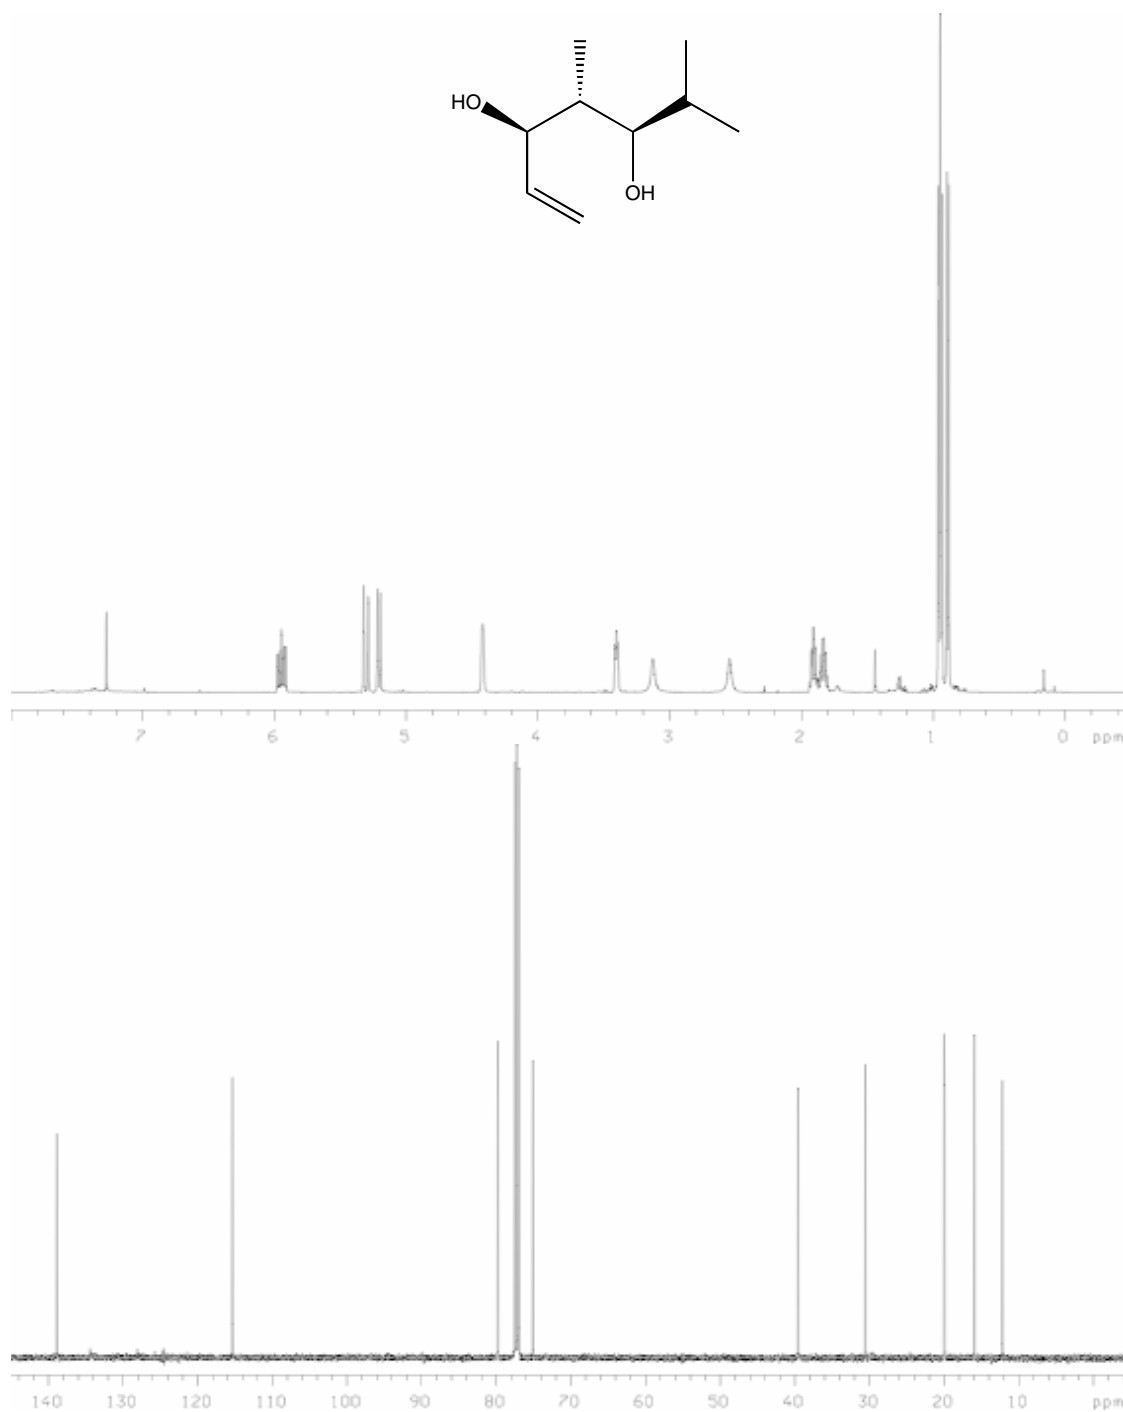

NMR data for compound **14a**

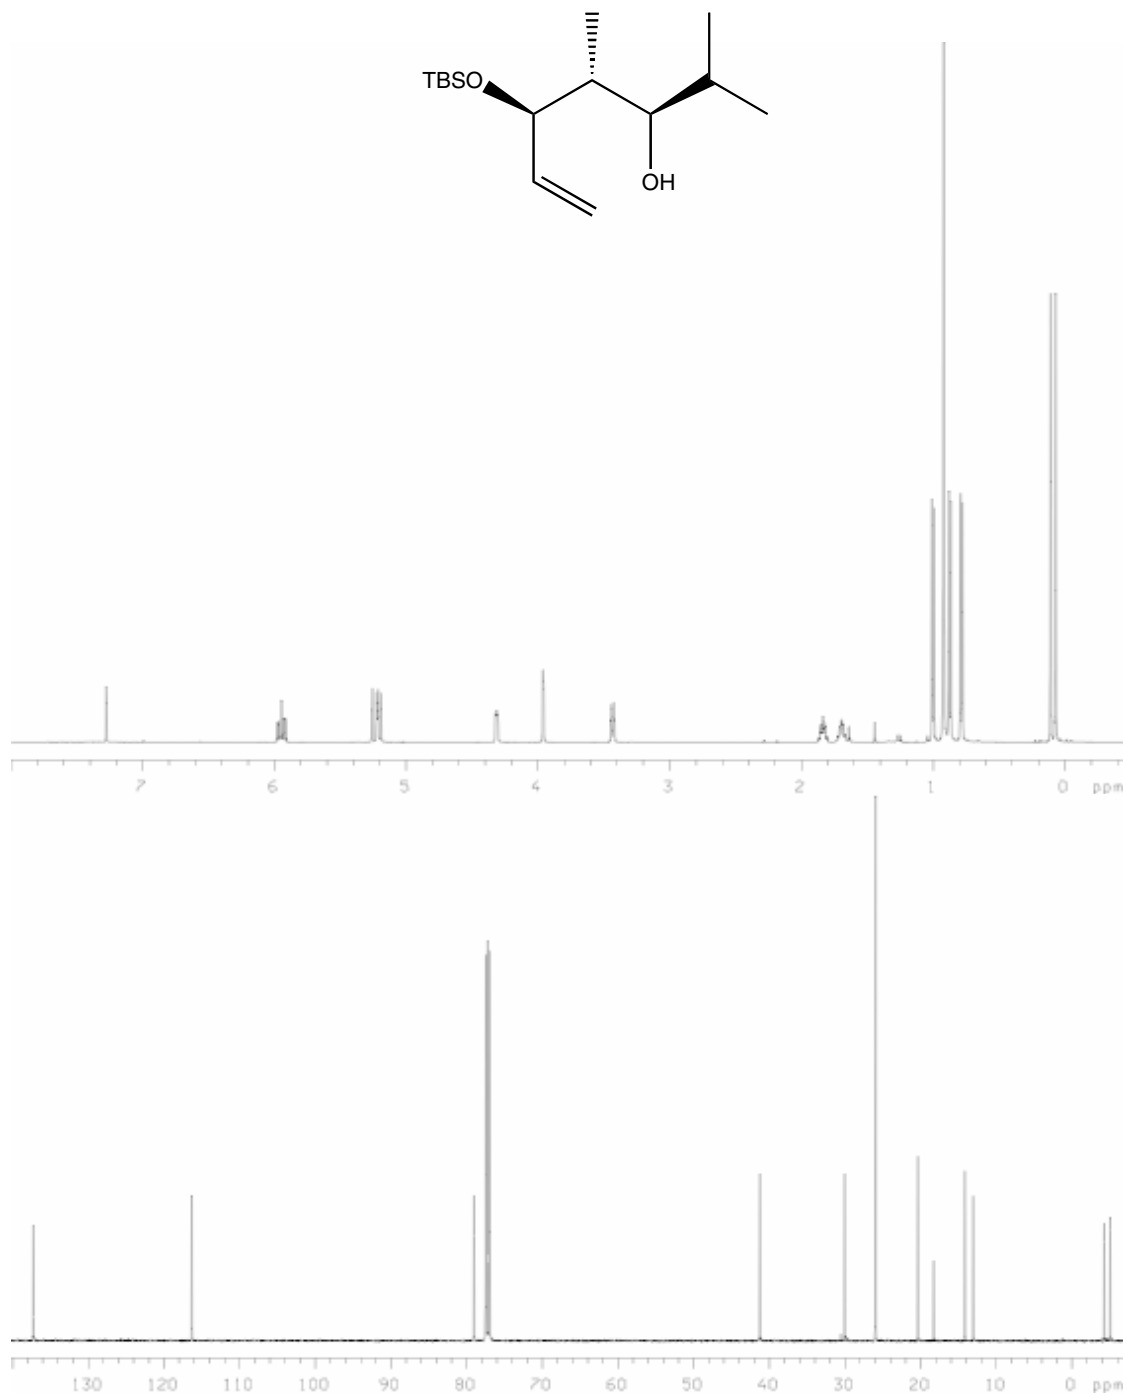

NMR data for compound **15a**

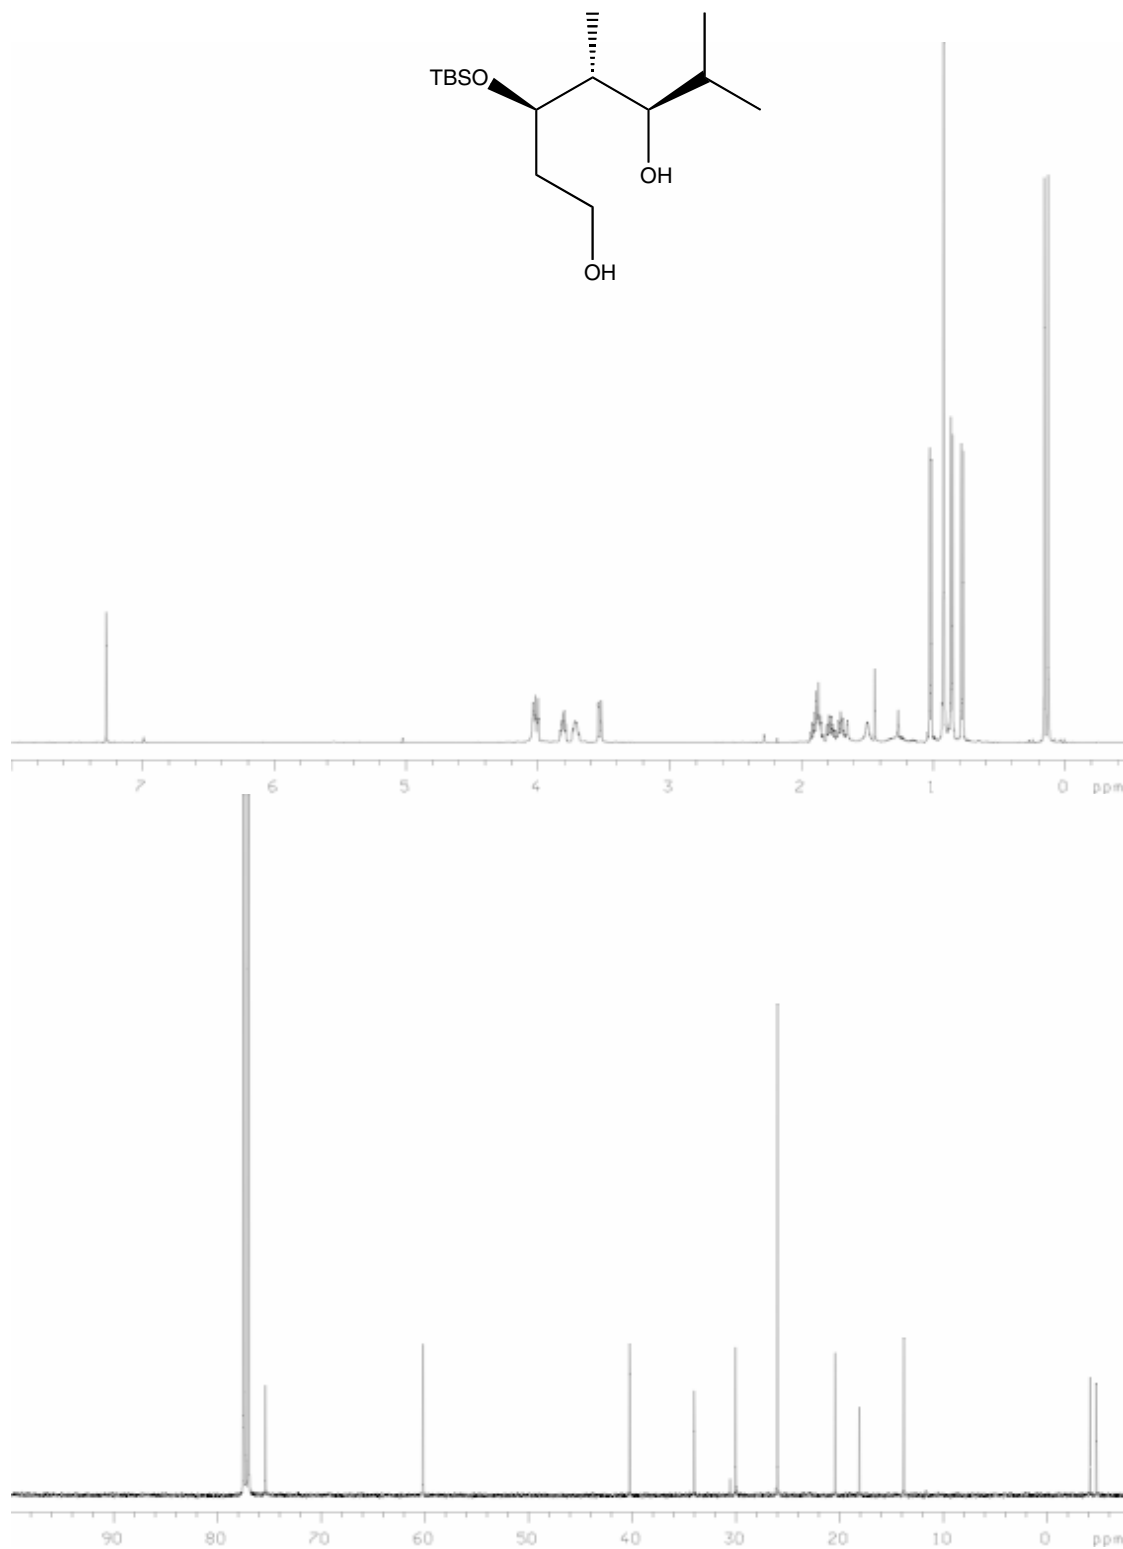

NMR data for compound 1

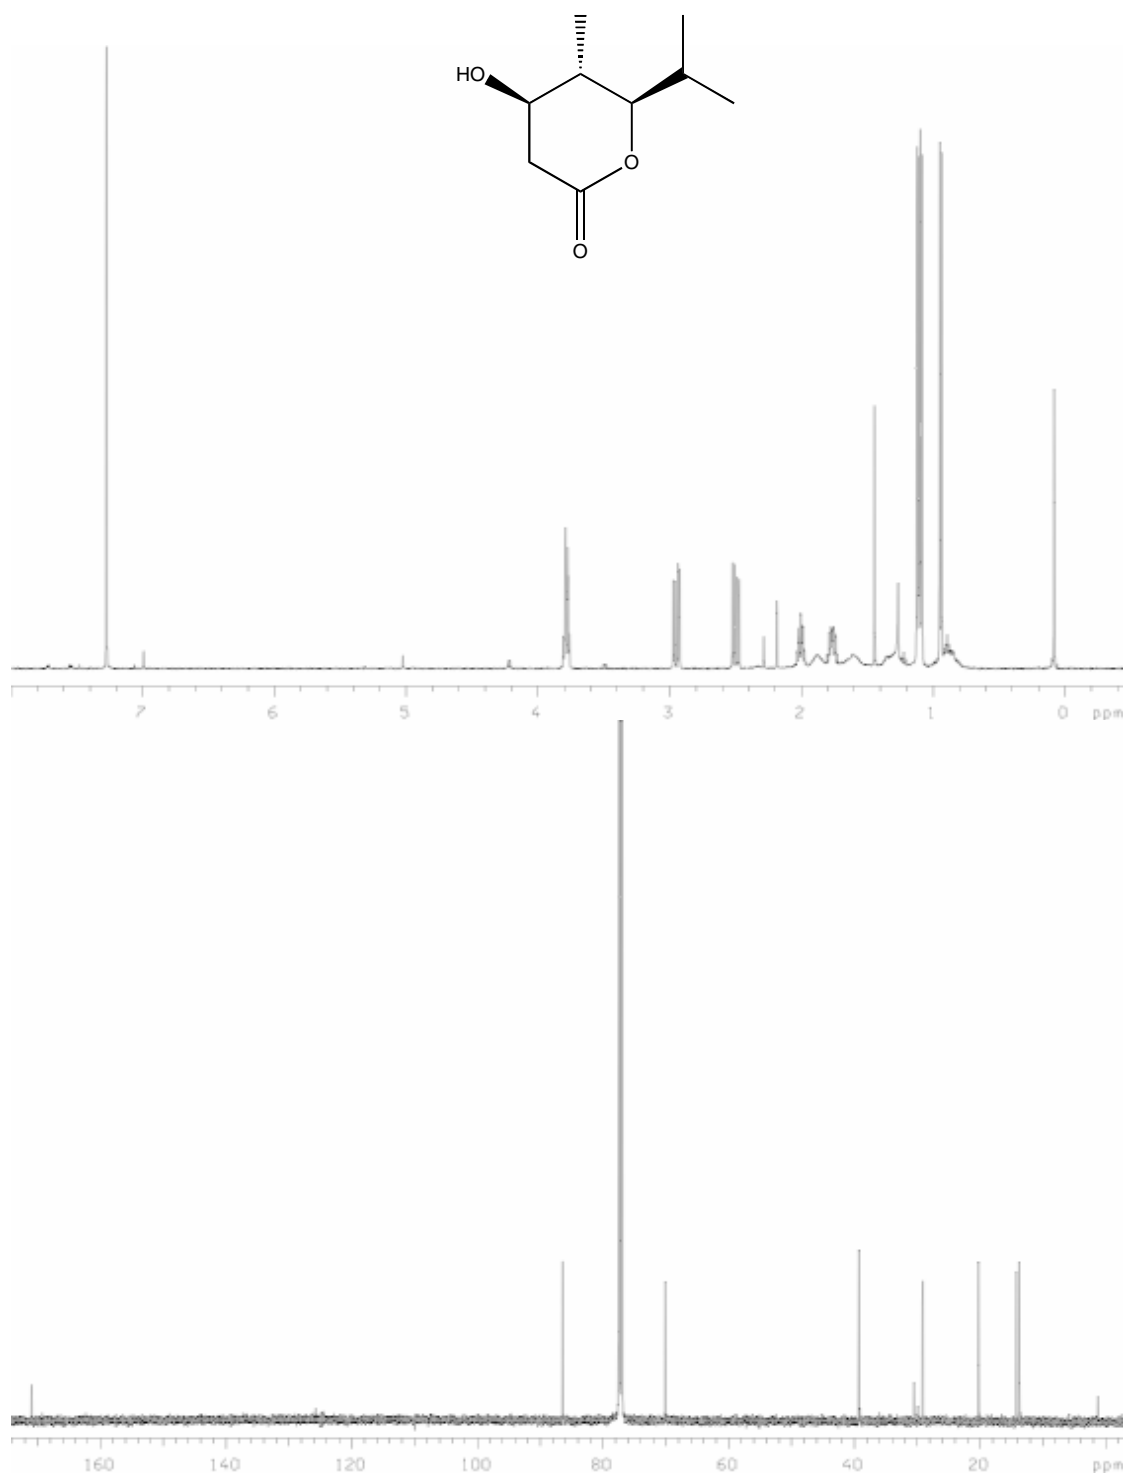

NMR data for compound **10b**

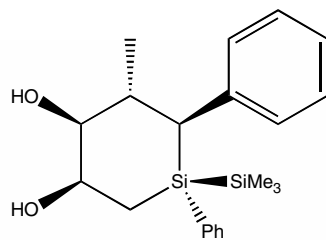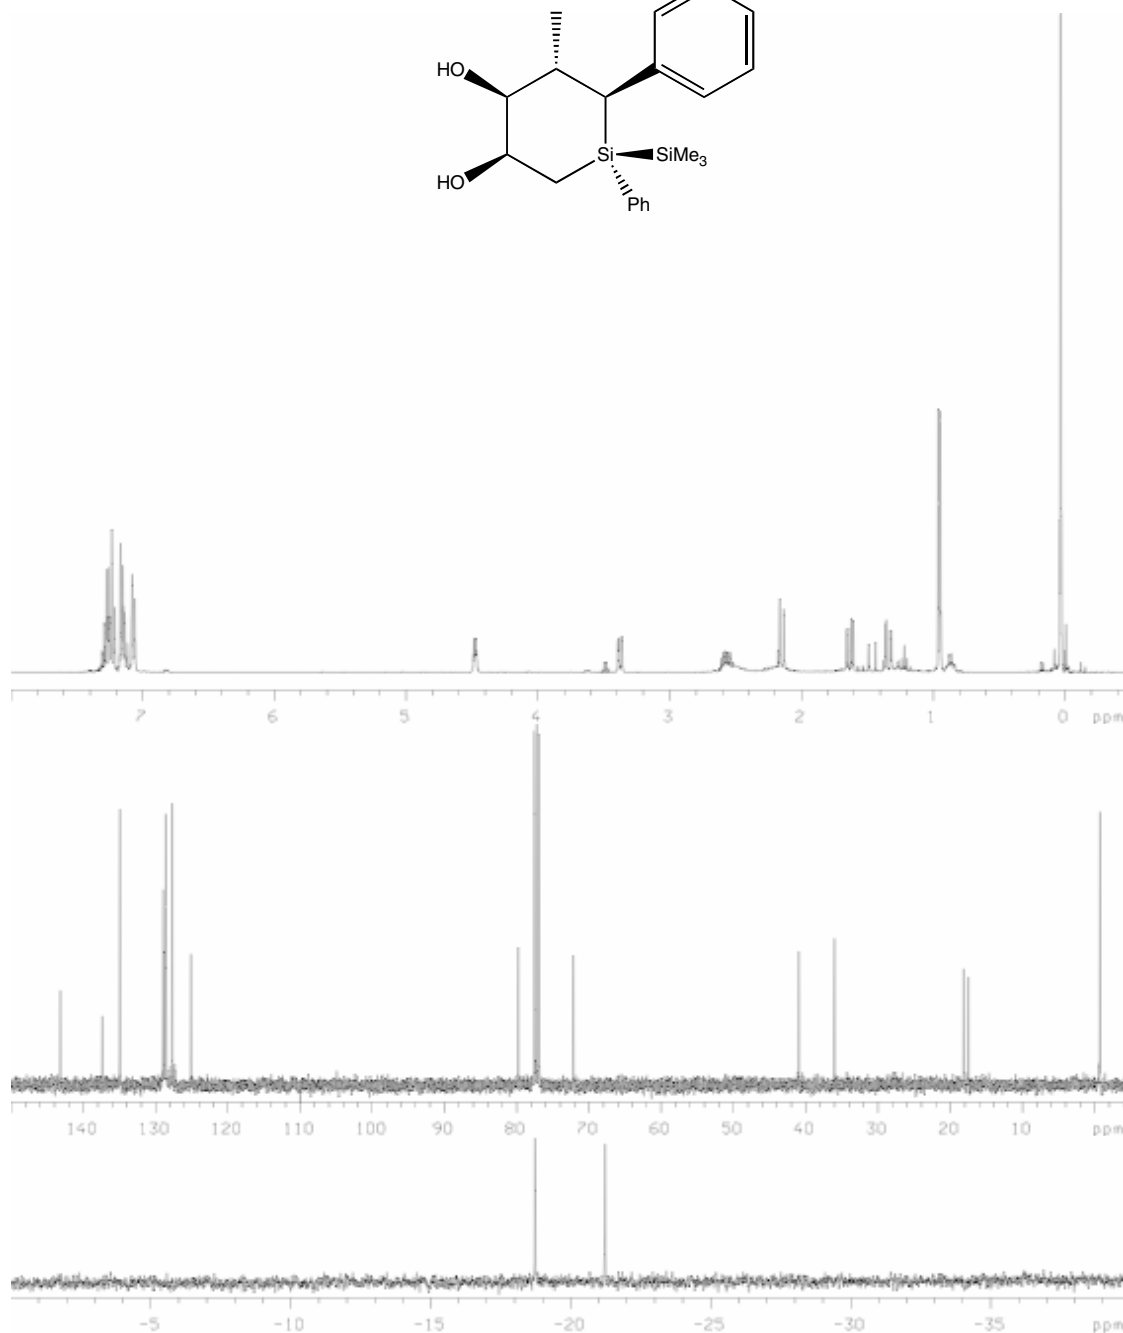

NMR data for compound **13b**

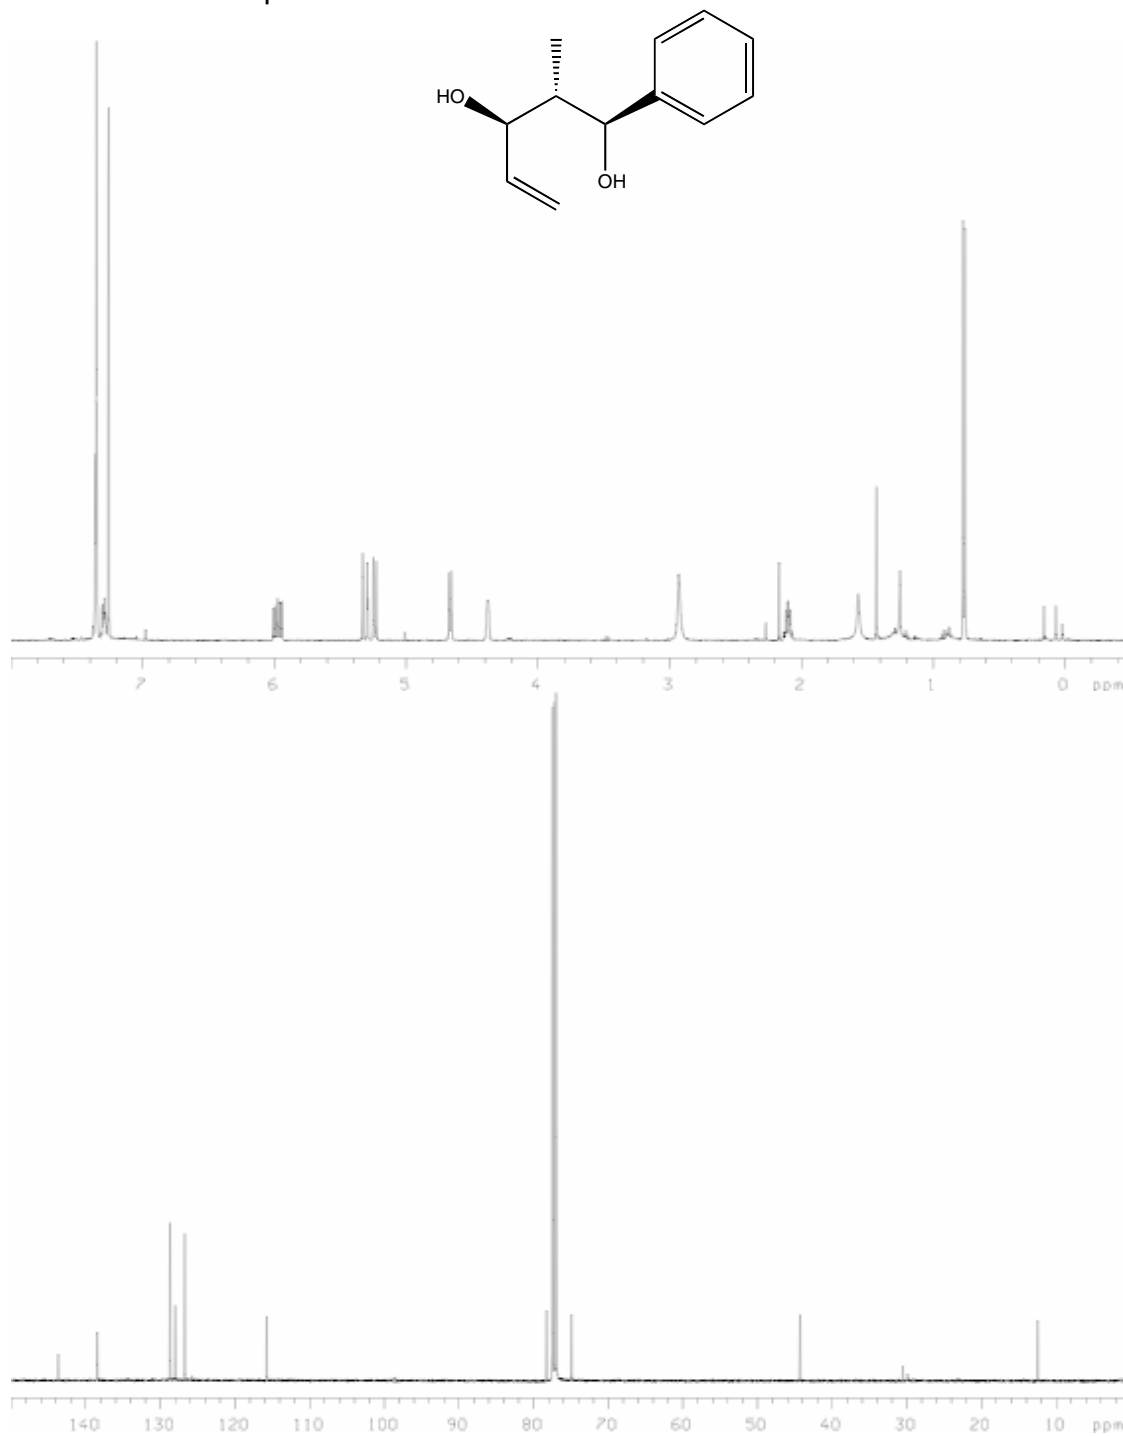



NMR data for compound **14b**

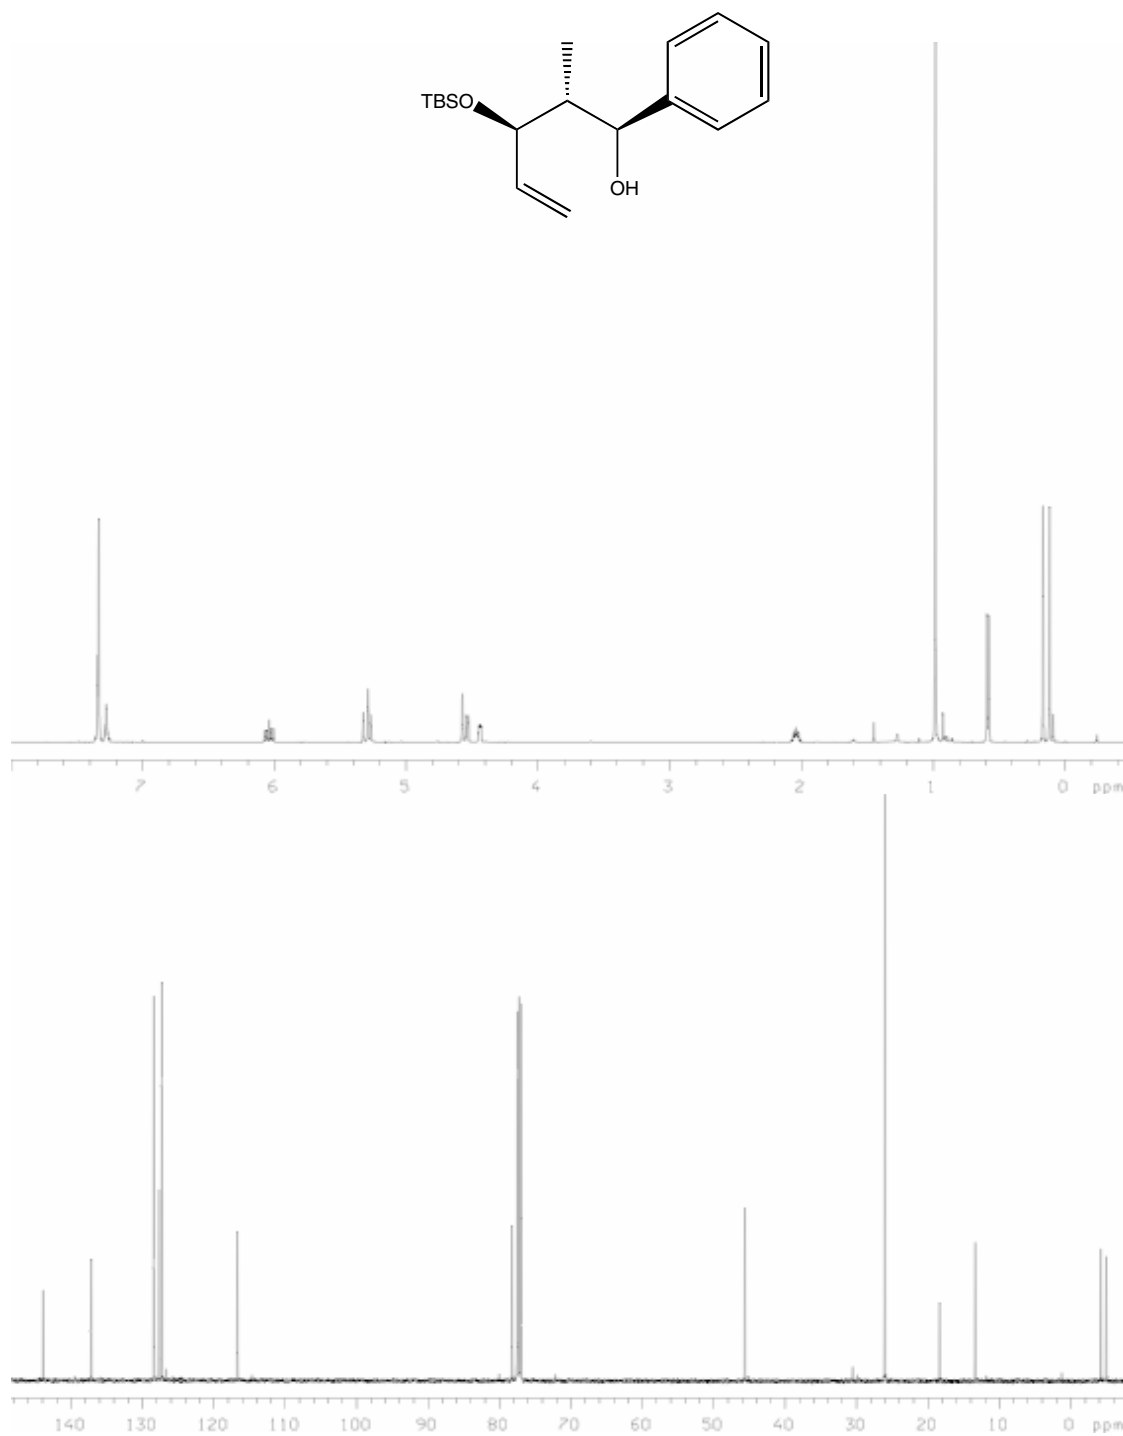

NMR data for compound **15b**

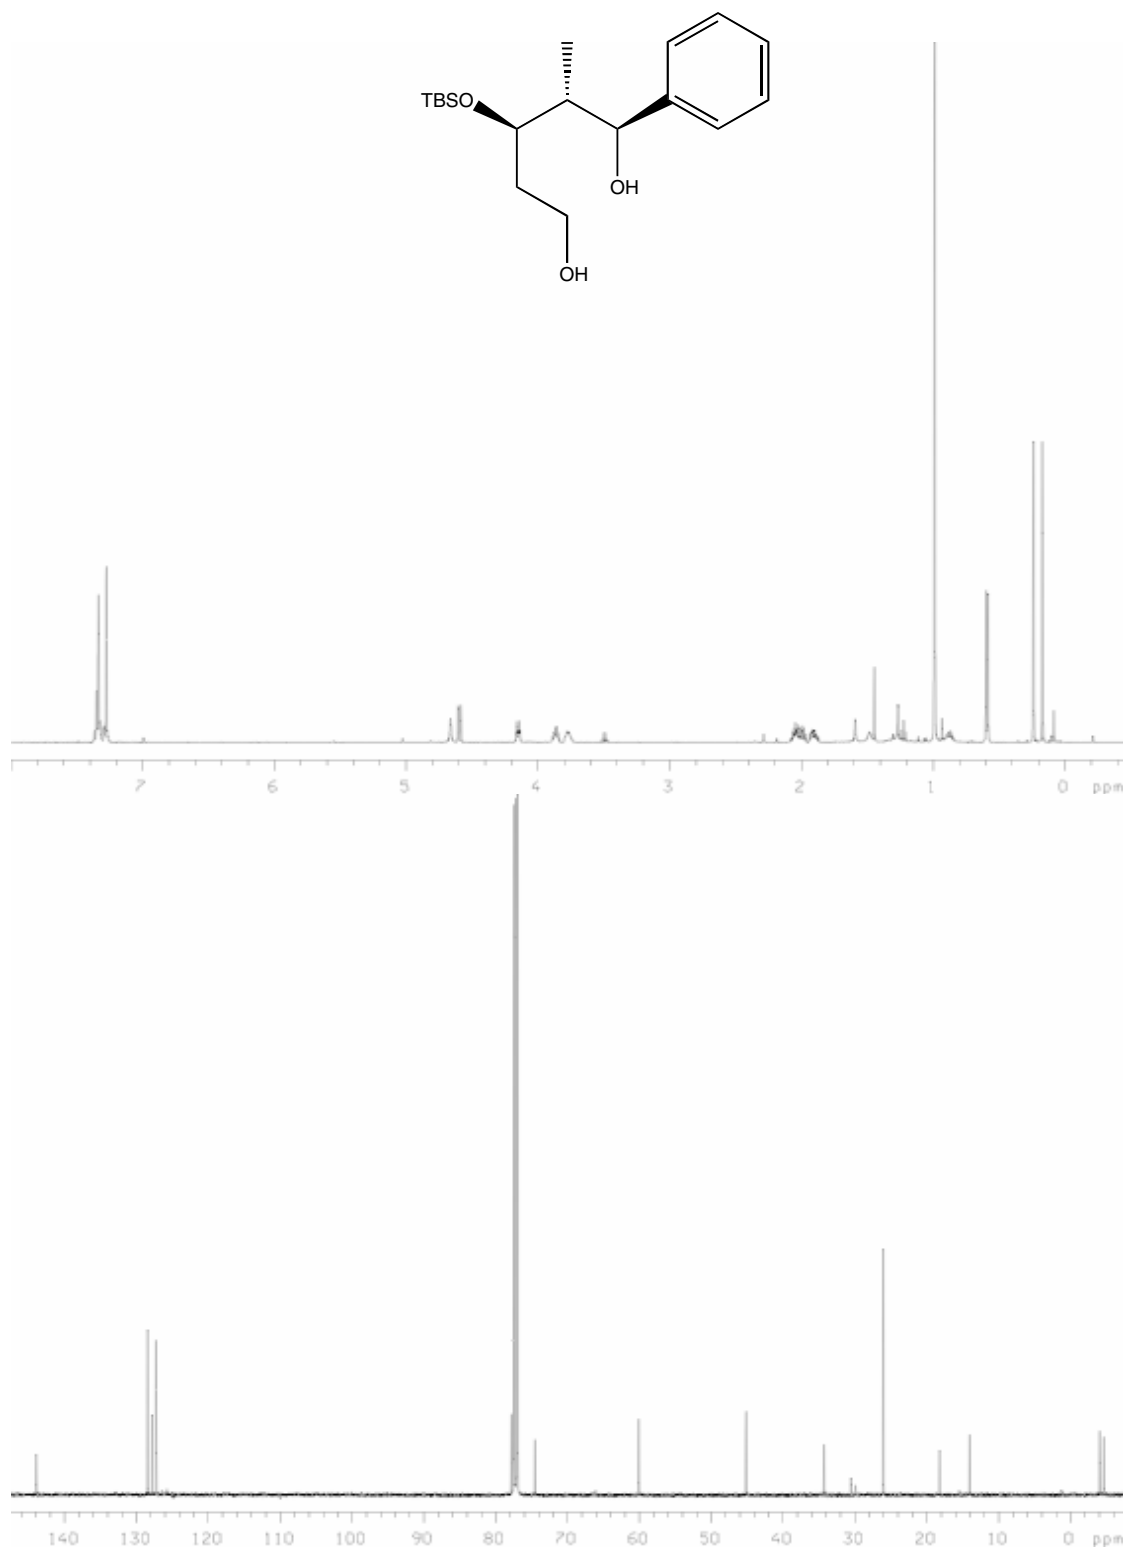

NMR data for compound **16**

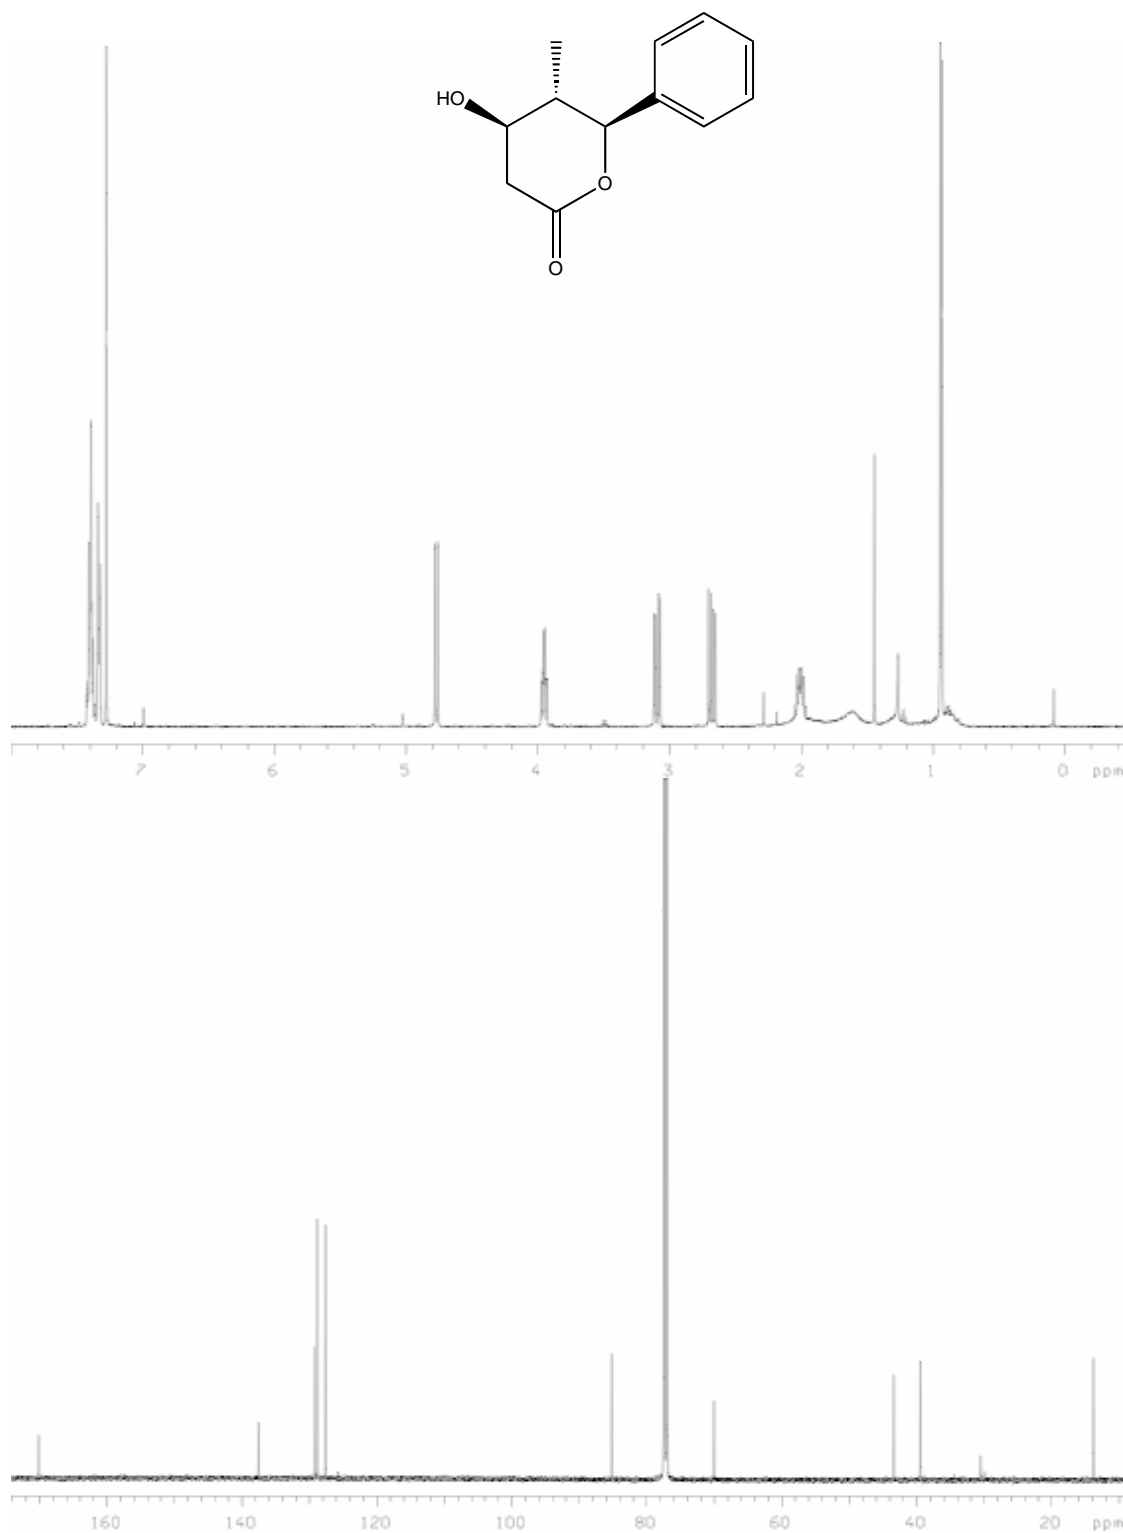

Supplement: b608989e.pdf [file b608989e.pdf]
